# Supplementary material for: Effect of Stored Humidity and Initial Moisture Content on the Qualities and Mycotoxin Levels of Maize Germ and Its Processing Products
Source: Toxins (Basel). 2020 Aug 20;12(9):535. doi: 10.3390/toxins12090535 (PMC7551338; doi:10.3390/toxins12090535)
Supplement: Supplementary file 1 [file toxins-12-00535-s001.pdf]

# Supplementary Materials: Effect of Stored Humidity and Initial Moisture Content on the Qualities and Mycotoxin Levels of Maize Germ and Its Processing Products

Yun-qi Wen, Li-li Xu, Chang-hu Xue and Xiao-ming Jiang

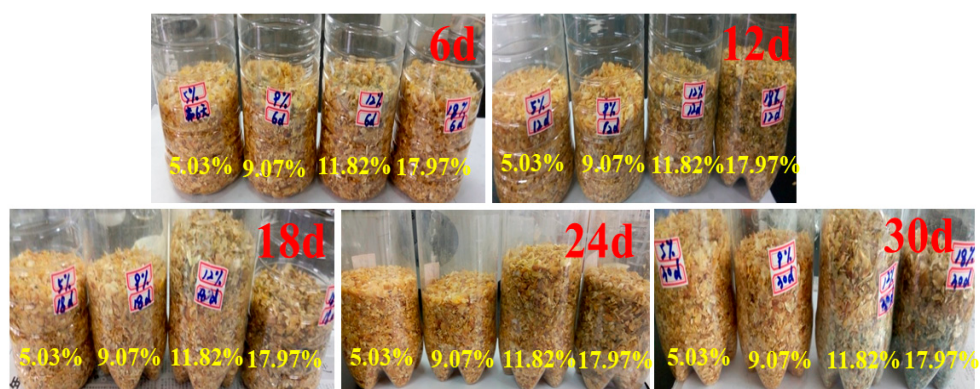

**Figure S1.** the appearances of maize germs during the 30 days storage with different initial moisture contents.

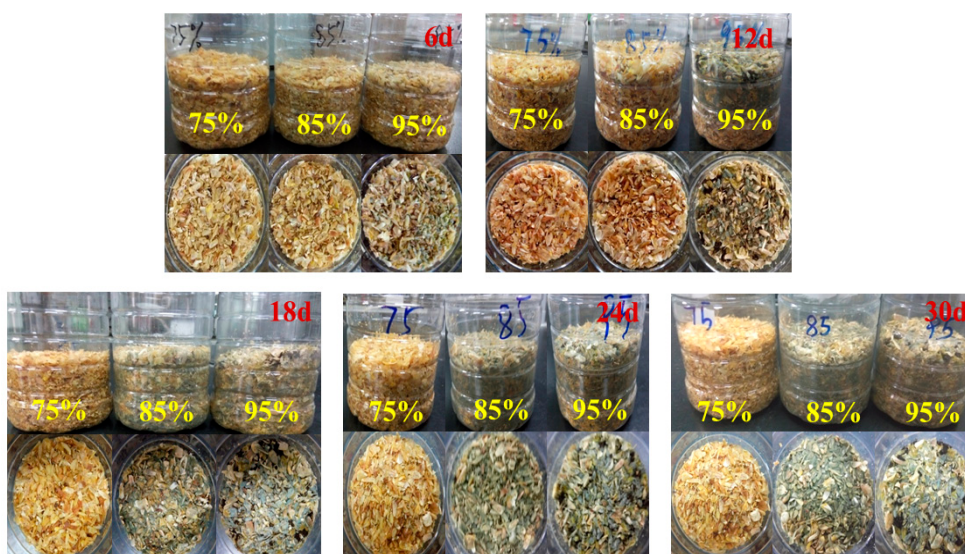

**Figure 2S.** the appearances of maize germs during the 30 days storage at different relative humidity.
